# Supplementary material for: TLE4 Is a Critical Mediator of Osteoblast and Runx2-Dependent Bone Development
Source: PubMed Central journal article supplement (PMC8377417; doi:10.3389/fcell.2021.671029), 2021-08-06
Supplement: Data_Sheet_1.pdf [file Data_Sheet_1.pdf]

## *Supplementary Material*

### 1 Supplementary Table 1

**Supplementary Table 1.** List of mouse primers used for qRT-PCR (SYBR Green)

| Gene  | Forward (5' to 3')         | Reverse (5' to 3')        |
|-------|----------------------------|---------------------------|
| Oc    | ACAAGTCCCACACAGCAGCTT      | GCCGGAGTCTGTTCACCTACTACCT |
| Osx   | GTACGGCAAGGCTTCGCATCTG     | CTGATGTTTGCTCAAGTGGTCGC   |
| Opg   | GGCCTGATGTATGCCCTCAA       | GTGCAGGAACCTCATGGTCTTC    |
| Spp1  | CCCGGTGAAAGTGAAGTACTGATTCT | GATCTGGGTGCAGGCTGTAAA     |
| Ap    | CACAGATTCCCAAAGCACCT       | GGGATGGAGGAGAGAAGGTC      |
| Runx2 | GCCGGGAATGATGAGAACTA       | GGTGAAACTCTTGCCTCGTC      |
| 18s   | CGGAAATAGCCTTCGCCATCAC     | ATCACTCGCTCCACCTCATCCT    |
| Bmp2  | ACTTTTCTCGTTTGTGGAGC       | GAACCCAGGTGTCTCCAAGA      |
| Bmp4  | TGAGCCTTTCAGCAAGTTT        | CTTCCCAGTCTCAGGTATCA      |
| Runx1 | CACCGTCTTTACAAATCCGCCAC    | CGCTCGGAAAAGGACAAACTCC    |

### 2 Supplementary Figure 1

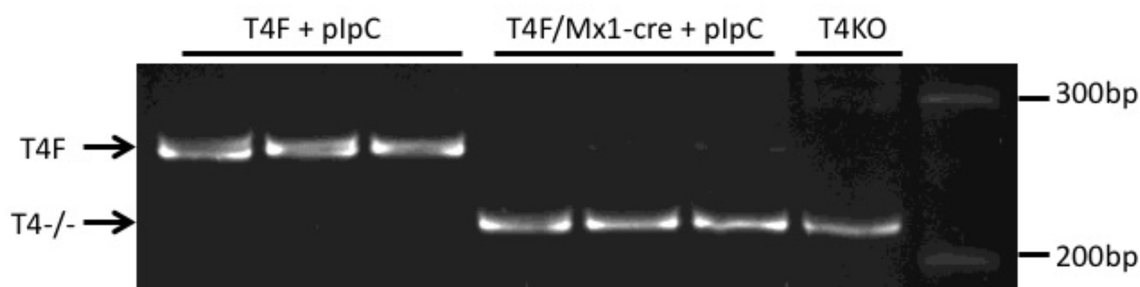

**Supplementary Figure 1.** High Efficiency of *Tle4* knockout with *Mx1-cre* induction by pIpC in conditional *Tle4* null mice. Mice homozygous for a conditional *Tle4* allele consisting of *loxP*-flanked exon2 were treated with pIpC. Mice containing *Mx1-cre* demonstrate very high level of excision of exon 2 resulting in a reduced PCR product in this assay from 264 bp to 224 bp, matching the product seen in *T4KO* mice.

**3. Supplementary Figure 2**

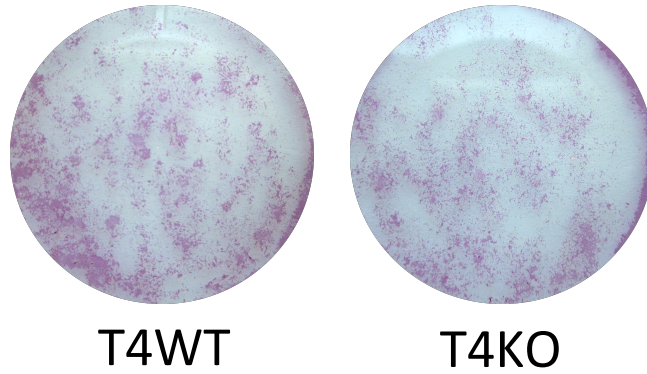

**Supplementary Figure 2.** Alkaline Phosphatase staining in stromal cells cultures generated from bones of one-week old T4WT or T4KO littermates.
